# Supplementary material for: Inhibition of TGF-β Signaling Suppresses Th17 Differentiation and Promotes Treg Numbers but does not Reduces Experimental Arthritis
Source: Research Square preprint supplement (doi:10.21203/rs.3.rs-908009/v1), 2021-10-01
Supplement: Supplementary file 1 [file f1c1fb3b7c31497dd839476c.docx]

DMSO + TGFβ SB-505124 + TGFβ

A B


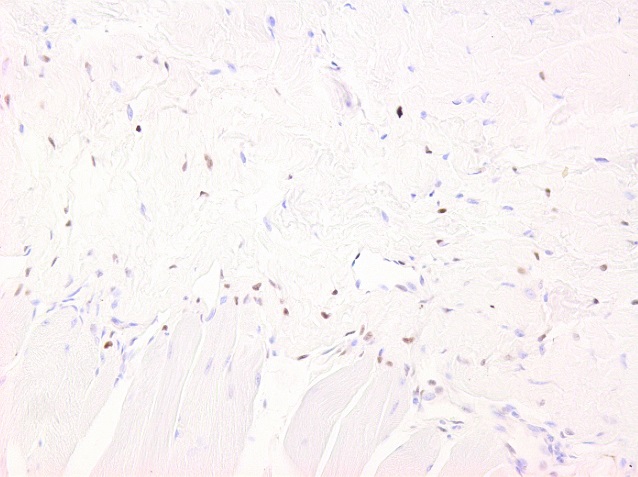

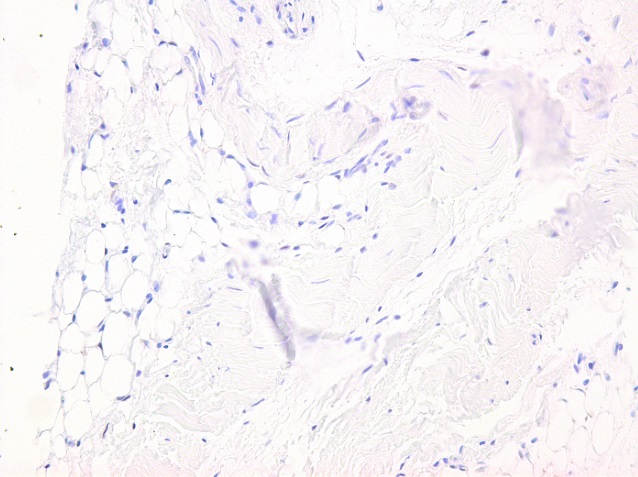


**Supplementary figure S1. Intra-articular injection of SB-505124 + TGFβ results in less pSMAD2/3 confirming the efficacy of SB-505124.** Synovium from naïve mice was collected to determine pSMAD2/3 3 hours after intra articular injection of SB-505124 with TGFβ . Injection with SB-505124 (B) resulted in less pSMAD2/3 compared to TGFβ injected mice (A) (n=3 mice).

DMSO + TGFβ SB-505124 + TGFβ

A B


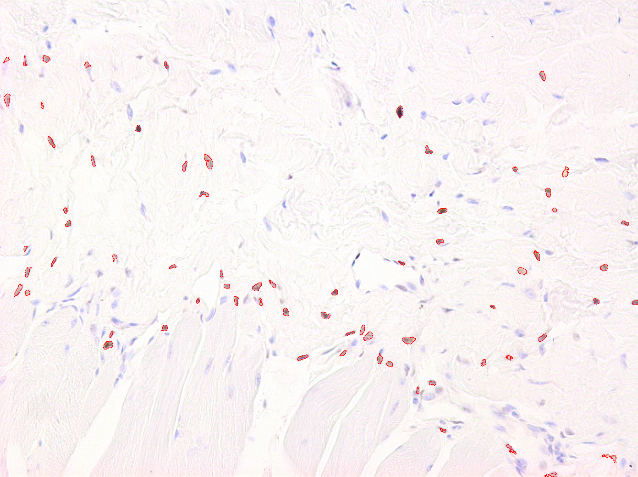

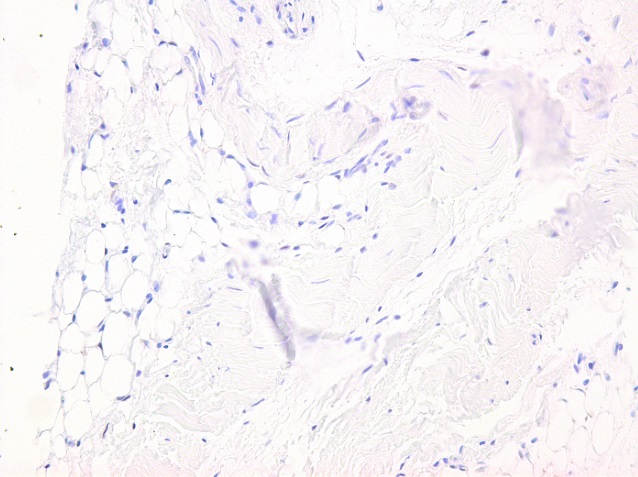


**Supplementary figure S2. Intra-articular injection of SB-505124 + TGFβ results in less pSMAD2/3 confirming the efficacy of SB-505124.** Synovium from naïve mice was collected to determine pSMAD2/3 3 hours after intra articular injection of SB-505124 with TGFβ . Injection with SB-505124 (B) resulted in less pSMAD2/3 compared to TGFβ injected mice (positive cells highlighted with use of ImageJ) (A) (n=3 mice).


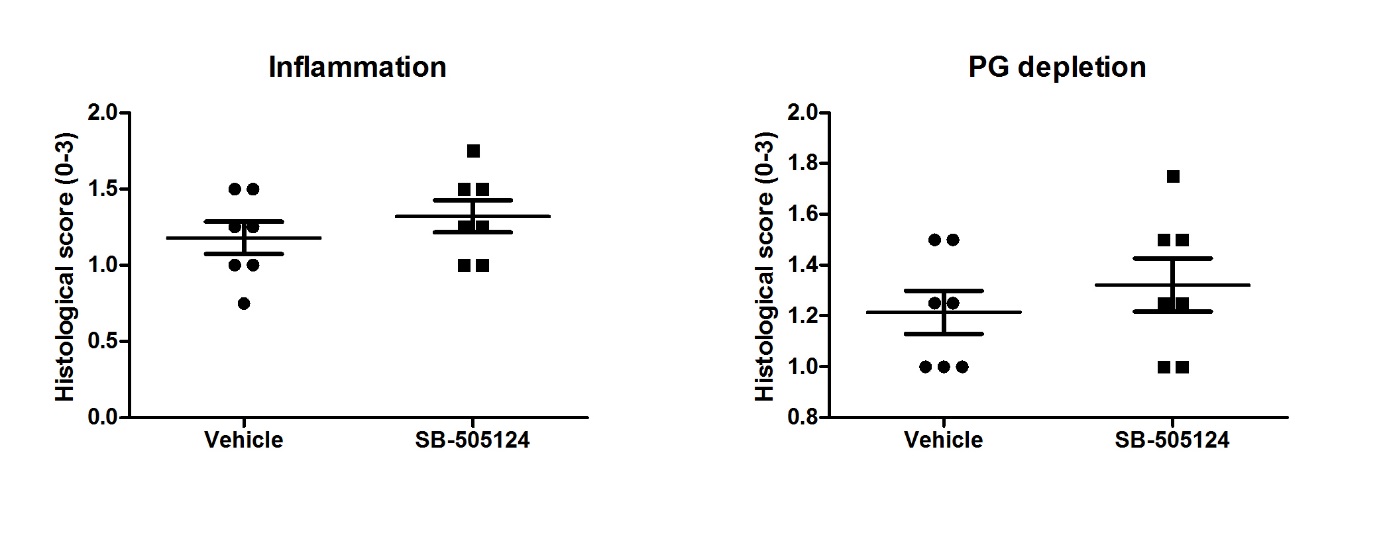
A B

**Supplementary figure S3.** **Repeated intra-articular injections of SB-505124 do not decrease joint inflammation and cartilage PG depletion during streptococcal cell wall (SCW) arthritis.** Mice were daily injected i.a. with vehicle or SB-505124 for 4 days. Total knee joints were isolated for histopathologic analysis (n=7 mice/group). Joint inflammation (H&E stain, original magnification 100x) (A) and PG depletion (Safranin O staining, original magnification 100x) (B) on day 4 were analyzed on histological slides. Values are mean ±SEM.
